# Supplementary material
Source: MDPI journal article supplement (https://www.mdpi.com/2306-5338/8/2/81)
Supplement: s1 [file s1]

**Table S1.** Additional basic statistics data of the three cities in Eastern Guangdong

| City     | Years | National<br>Land area<br>(km <sup>2</sup> ) | Resident<br>population (10 <sup>4</sup> ) | Paddy area<br>(ha) | Dry land<br>area (ha) | Soybean<br>planting area<br>(ha) | Peanut<br>acreage<br>(ha) | Year-end<br>inventory of<br>cattle (10 <sup>4</sup> ) | Year-end<br>inventory of goat<br>(10 <sup>4</sup> ) |
|----------|-------|---------------------------------------------|-------------------------------------------|--------------------|-----------------------|----------------------------------|---------------------------|-------------------------------------------------------|-----------------------------------------------------|
| Shantou  | 2000  | 2064.00                                     | 467.78                                    | 48,605.08          | 8372.30               | 498.00                           | 2317.00                   | 0.25                                                  | 39.78                                               |
|          | 2005  | 2064.00                                     | 494.45                                    | 30,222.00          | 5025.00               | 398.00                           | 1429.00                   | 0.40                                                  | 36.98                                               |
|          | 2010  | 2248.00                                     | 539.62                                    | 29,387.00          | 1910.00               | 259.00                           | 1341.00                   | 0.19                                                  | 44.31                                               |
|          | 2015  | 2199.04                                     | 555.21                                    | 28,267.15          | 4666.02               | 253.00                           | 1286.00                   | 0.26                                                  | 45.01                                               |
| Chaozhou | 2000  | 3110.00                                     | 240.44                                    | 38,758.29          | 9166.35               | 999.00                           | 2998.00                   | 0.21                                                  | 53.18                                               |
|          | 2005  | 3110.00                                     | 252.01                                    | 36,817.00          | 8352.00               | 694.00                           | 2131.00                   | 0.17                                                  | 45.48                                               |
|          | 2010  | 3100.00                                     | 267.21                                    | 27,047.00          | 2692.00               | 377.00                           | 1674.00                   | 0.20                                                  | 35.58                                               |
|          | 2015  | 3145.93                                     | 264.05                                    | 25,985.92          | 8470.42               | 364.00                           | 1473.00                   | 0.24                                                  | 39.91                                               |
| Jieyang  | 2000  | 5240.00                                     | 524.61                                    | 96,976.08          | 24,732.79             | 3256.00                          | 11,250.00                 | 1.66                                                  | 103.73                                              |
|          | 2005  | 5240.00                                     | 559.69                                    | 95,109.00          | 25,273.00             | 3567.00                          | 10,476.00                 | 5.43                                                  | 105.98                                              |
|          | 2010  | 5266.00                                     | 588.30                                    | 94,200.00          | 22,607.00             | 3036.00                          | 7384.00                   | 1.38                                                  | 98.09                                               |
|          | 2015  | 5265.38                                     | 605.89                                    | 67,454.75          | 19,032.13             | 3061.00                          | 7607.00                   | 1.34                                                  | 94.63                                               |

| City     | Years | Year-end inventory<br>of pigs (10 <sup>4</sup> ) | Year-end inventory<br>of poultry (10 <sup>4</sup> ) | Rice yield<br>(10 <sup>4</sup> t) | Soybean yield<br>(10 <sup>4</sup> t) | Peanut yield<br>(10 <sup>4</sup> t) | Vegetable yield<br>(10 <sup>4</sup> t) |
|----------|-------|--------------------------------------------------|-----------------------------------------------------|-----------------------------------|--------------------------------------|-------------------------------------|----------------------------------------|
| Shantou  | 2000  | 39.78                                            | 987.89                                              | 52.17                             | 0.11                                 | 0.65                                | 146.41                                 |
|          | 2005  | 36.98                                            | 908.61                                              | 35.74                             | 0.08                                 | 0.36                                | 154.87                                 |
|          | 2010  | 44.31                                            | 938.26                                              | 31.57                             | 0.05                                 | 0.33                                | 151.02                                 |
|          | 2015  | 45.01                                            | 853.86                                              | 32.57                             | 0.05                                 | 0.34                                | 177.68                                 |
| Chaozhou | 2000  | 53.18                                            | 652.47                                              | 39.32                             | 0.21                                 | 0.73                                | 56.35                                  |
|          | 2005  | 45.48                                            | 526.00                                              | 33.06                             | 0.14                                 | 0.48                                | 53.06                                  |
|          | 2010  | 35.58                                            | 635.69                                              | 20.68                             | 0.08                                 | 0.40                                | 40.31                                  |
|          | 2015  | 39.91                                            | 582.00                                              | 21.31                             | 0.08                                 | 0.36                                | 48.15                                  |
| Jieyang  | 2000  | 103.73                                           | 1343.62                                             | 82.04                             | 0.67                                 | 2.80                                | 157.61                                 |
|          | 2005  | 105.98                                           | 1104.56                                             | 68.12                             | 0.76                                 | 2.56                                | 188.81                                 |
|          | 2010  | 98.09                                            | 999.40                                              | 47.04                             | 0.72                                 | 2.32                                | 171.46                                 |
|          | 2015  | 94.63                                            | 885.09                                              | 47.90                             | 0.77                                 | 2.49                                | 220.42                                 |
